# Supplementary material
Source: PubMed Central journal article supplement (PMC4487910)
Supplement: NIHMS700484-supplement-supplement_1.pdf [file NIHMS700484-supplement-supplement_1.pdf]

**Supplementary Table S1:** Shown here is the schematic diagram of amino acid alignment map for CHD3, CHD4 and CHD5 proteins indicating the sequence homology. Consensus sequence is shown in the bottom lane and the color description is as follows based on the nature of the R-group of amino acid.

|            |           |                                         |
|------------|-----------|-----------------------------------------|
| Yellow     | Sulphor   | M, C (Met, Cys)                         |
| B/W        | Aliphatic | G, A, V, L, I (Gly, Ala, Val, Leu, Ile) |
| Pink       | Hyroxyl   | S, T (Ser, Thr)                         |
| Green      | Circular  | P (Pro)                                 |
| Dark Blue  | Basic     | K, R, H (Lys, Arg, His)                 |
| Red        | Acidic    | E, G (Asp, Glu)                         |
| Orange     | Benzene   | F, W, Y (Phe, Trp, Tyr)                 |
| Light Blue | Amide     | N, Q (Asn, Gln)                         |
